# Supplementary material
Source: Research Square preprint supplement (doi:10.21203/rs.3.rs-9995686/v1)
Supplement: Supplementary file 1 [file d972ed00d15a4e3bba40a2b5.docx]

# Supplementary Materials for "Bounded Rationality and Resilience in Global Rare Earth Supply Chains: An LLM-Powered Multi-Agent Simulation"

## Submission Statements

[Author contributions removed for blind review]

**Conflict of Interest:** The authors declare that they have no known competing financial interests or personal relationships that could have appeared to influence the work reported in this paper.

**Data Availability Statement:** The raw bilateral rare earth trade data used to construct the simulation network are publicly available from the United Nations Comtrade database (<https://comtradeplus.un.org>). Producer Price Index data for industrial commodities were obtained from the Federal Reserve Economic Data (FRED) repository. The calibrated five-node trade network matrices for 2011, 2018, and 2023 are included in the project repository as CSV files. The full simulation output datasets are available in the outputs directory of the project repository. Processed datasets not included in the repository are available from the corresponding author upon reasonable request.

**Code Availability Statement:** The complete simulation code, including the main simulation engine (MVP.py), agent architectures, the Delta-Buffer synchronous market-clearing mechanism, LLM prompt templates, post-processing scripts, and figure generation scripts, is available at <https://github.com/b983407750-del/LLM>. The simulation relies on the DeepSeek-Chat API (deepseek-chat model, temperature 0.5) for LLM-powered agent decisions; API access requires a valid DeepSeek API key. All LLM response data are cached in the repository for reproducibility.

[Acknowledgements removed for blind review]

## Appendix A. LLM Prompt Architecture and Reproducibility

This appendix documents the prompt architecture, API configuration, parsing procedures, and reproducibility protocols used to elicit bounded-rational trade decisions from LLM-powered agents in the simulation. All prompts are generated programmatically from the simulation state vector using a Python string-formatting pipeline implemented in MVP.py.

### A.1 System Prompt

Each LLM-powered agent receives the following system prompt at the beginning of every decision round:

"You are a strategic decision-maker in the global rare earth supply chain. Return valid JSON only."

The system prompt establishes the agent's domain context and enforces a structured JSON output constraint. No additional role specialisation or behavioural instruction is provided in the system message, allowing the model's pre-training on geopolitical and trade-related corpora to inform the decision without steering toward a particular strategy profile.

### A.2 User Prompt Template

The user prompt is constructed dynamically from the current simulation state and scenario configuration:

Scenario: {scenario_description}
Current State: {state_dict}
Country Profile: {country_profile}
Allowed Actions: ["seek_ally_support", "search_alternative_source", "hoard_inventory", "release_inventory", "gray_transshipment", "restrict_or_prioritize_export"]
Return JSON: {"primary_action":"...","secondary_action":"...","panic_level":0.0-1.0,"strategy_intensity":0.0-1.0}

Country profiles supply geopolitical role and goal metadata to each sovereign agent:

- CHN: role = "dominant processor"; goals = [strategic_leverage]
- USA: role = "major end-market"; goals = [industrial_security]
- JPN: role = "dependent manufacturer"; goals = [continuity, diversification]
- MMR: role = "upstream supplier"; goals = [revenue, reduce dependency]
- MYS: role = "processing hub"; goals = [arbitrage, industrial upgrade]

### A.3 Illustrative Example: USA Agent, 2011, Round 3, EC-30%

System message: "You are a strategic decision-maker in the global rare earth supply chain. Return valid JSON only."

User message:

Scenario: China 30% export restriction to USA/JPN
Current State: {"country": "USA", "supply_gap_rate": 0.125, "inventory_status": "low", "industry_risk": "medium", "alliance_strength": "strong", "price_multiplier": 2.46, "previous_action": "seek_ally_support"}
Country Profile: {"role": "major end-market", "goals": ["industrial_security"]}
Allowed Actions: ["seek_ally_support", "search_alternative_source", "hoard_inventory", "release_inventory", "gray_transshipment", "restrict_or_prioritize_export"]
Return JSON: {"primary_action":"...","secondary_action":"...","panic_level":0.0-1.0,"strategy_intensity":0.0-1.0}

LLM response: {"primary_action": "search_alternative_source", "secondary_action": "seek_ally_support", "panic_level": 0.6, "strategy_intensity": 0.7}

### A.4 Prompt Sensitivity Analysis

To assess robustness to prompt wording, three alternative phrasings of the country identity instruction were tested for the China agent in the 2023 EC-50% configuration:

- Variant 1: "you must protect domestic supply"
- Variant 2: "your primary objective is supply security"
- Variant 3: "as a major exporter, you balance domestic needs against trade relations"

CER values across the three variants ranged from 1.823 to 1.961 (spread = 0.138 CER units), smaller than the within-temperature stochastic variance across 28 Monte Carlo runs (SD = 0.312), confirming that the satisficing signature is not an artefact of specific prompt wording.

### A.5 API Configuration

- Endpoint: https://api.deepseek.com/v1/chat/completions (DeepSeek-Chat V3 / deepseek-chat)
- Qwen endpoint: https://dashscope.aliyuncs.com (Qwen-Plus, model ID: qwen-plus-2025-01-25)
- GLM endpoint: https://open.bigmodel.cn (GLM-4-Flash, model ID: glm-4-flash)
- Temperature: 0.5 (all models)
- max_tokens: 512
- top_p: 0.95
- Timeout: 25 seconds
- Max retries: 3 (exponential backoff: 2 s, 4 s, 8 s)
- Fallback rate: 1/480 (0.2%) across full main experiment

### A.6 Training Data Contamination Safeguards

The 2010 rare earth crisis is extensively documented in web corpora that formed the training data for all three LLMs tested. Three lines of evidence mitigate the contamination concern: (a) the 2023 scenario, which involves post-Ukraine sanctions configurations not present in any LLM training corpus at the time of the experiment, replicates the satisficing pattern at higher CER values (1.87 vs. 0.63 for 2011), inconsistent with a pure retrieval account; (b) the cross-LLM sensitivity checks (Section 4.6) shows that models with different training corpora and knowledge cutoffs produce qualitatively identical behavioural signatures; (c) the behavioural differentiation results (Section 4.1) show LLM agents occupying a statistically distinct regime from all three deterministic baselines across 18 pairwise comparisons, a pattern inconsistent with simple document retrieval.

### A.7 Reproducibility Statement

Exact reproduction of the full set of LLM-elicited decisions requires: (1) the same version of the DeepSeek API model deployed at the time of the original experiment; (2) temperature = 0.5 and max_tokens = 512; (3) MASTER_SEED = 42 for all non-LLM agents; (4) the same cache state (llm_cache.json), as cached decisions bypass API calls entirely. All cached responses are included in the public repository.

## Appendix B. Simulation Parameters and Calibration

### B.1 Model Parameters

- initial_inventory_ratio = 0.30. Initial inventory as fraction of annual demand. Source/rationale: IEA (2022) strategic stockpile benchmark.
- ally_support_cap = 0.15. Max inventory transferable from ally per round. Source/rationale: Exploratory political willingness constraint.
- alt_source_capacity_cap = 0.05. Max alternative source capacity expansion per round. Source/rationale: Short-term alternative capacity expansion cap.
- hoard_demand_multiplier = 0.20. Fraction of current production diverted to inventory. Source/rationale: Exploratory precautionary demand multiplier.
- demand_noise_range = 0.15. Idiosyncratic demand noise range (uniform ±%). Source/rationale: ABM-style heterogeneity.
- price_elasticity = 2.0. Elasticity coefficient α in pm = (1 + gap)^α. Source/rationale: Sensitivity analysis performed (SA-1); assessed over α ∈ {1.0, 1.5, 2.0, 3.0, 5.0}.
- restrict_extra_cut_cap = 0.15. Max additional export reduction from restrict action. Source/rationale: Constraint to avoid duplicating the macro shock.
- cost_eff_eps = 0.01. CER denominator floor ε (prevents singularity). Source/rationale: Minimum trade adjustment cost for any non-trivial market position.

### B.2 Experimental Design

- Years: 2011, 2018, 2023. Temporal snapshot of rare earth trade network under three geopolitical regimes.
- Shock intensity: 15%, 30%, 50%. Proportional reduction in China's export volume to USA and JPN.
- Agent models: Random, Rule-based, Greedy, LLM. Four cognitive architectures.
- Monte Carlo runs: 28 per configuration. Independent runs with stochastic ±15% demand noise.
- Decision rounds: 8 per run. Quarterly decision cycle (~2 years of simulated time).
- Main experiments: 3 × 3 × 4 × 28 = 1,008 runs. Full-factorial primary experiment.
- Robustness scenario: 3 × 4 × 28 = 336 runs. Bloc decoupling (supplementary directional check).

## Appendix D. Computational Cost Profile

The following metrics characterise the computational cost of a single complete experimental run (N = 1, all 3 years × 3 export-control intensities × 4 agent models × 28 runs = 1,008 simulation runs) on a single workstation. LLM timing was profiled with cache fully bypassed (FORCE_BYPASS_CACHE = True).

- Total LLM API calls: 480 calls
- Total tokens consumed: 124,935 tokens
- Prompt tokens: 103,164 tokens
- Completion tokens: 21,771 tokens
- Average tokens per decision: 260.3 tokens/call
- LLM wall-clock time (cache off): 3,909.1 s
- Non-LLM wall-clock time: 250.4 s
- Total wall-clock time: 4,384.2 s (73.1 min)
- LLM time share: 93.9% of total
- Fallback to rule-based: 1 / 480 calls (0.2%)
- Random agent run time: 84.7 s
- Rule-based agent run time: 82.5 s
- Greedy agent run time: 87.2 s
- LLM agent run time (cache off): 4,115.3 s
- LLM agent run time (cache on): ~84 s (cache-served decisions only)

API model: DeepSeek-Chat (V3) (model ID: deepseek-chat). Cache mode: bypassed for profiling. Scaling note: at approximately 260 tokens per decision and 480 decisions per complete run, a 10-node network expansion (doubling agents and rounds) would increase API costs by approximately 4×, and wall-clock time proportionally.

## Supplementary Tables

### Table S1: H1 Mann-Whitney U Test Results with Bonferroni Correction

| Scenario | Pair | Mean_A | Mean_B | U | p_raw | p_bonf | Cohen's d | d_95%_CI |
| --- | --- | --- | --- | --- | --- | --- | --- | --- |
| EC15% | Random vs Rule | 2.597 | 1.657 | 756 | 1.9e-10 | 1.2e-09 | 4.604 | [3.58, 5.63] |
| EC15% | Random vs Greedy | 2.597 | 0.620 | 784 | 7.0e-12 | 4.2e-11 | 9.679 | [7.77, 11.59] |
| EC15% | Random vs LLM | 2.597 | 2.221 | 713 | 1.5e-07 | 9.0e-07 | 1.542 | [0.93, 2.15] |
| EC15% | Rule vs Greedy | 1.657 | 0.620 | 784 | 1.3e-13 | 7.8e-13 | inf | N/A |
| EC15% | Rule vs LLM | 1.657 | 2.221 | 0 | 7.0e-12 | 4.2e-11 | -4.225 | [-5.19, -3.26] |
| EC15% | Greedy vs LLM | 0.620 | 2.221 | 0 | 7.0e-12 | 4.2e-11 | -11.988 | [-14.32, -9.65] |
| EC30% | Random vs Rule | 2.646 | 1.657 | 756 | 1.9e-10 | 1.2e-09 | 4.529 | [3.52, 5.54] |
| EC30% | Random vs Greedy | 2.646 | 0.870 | 784 | 7.0e-12 | 4.2e-11 | 8.129 | [6.50, 9.76] |
| EC30% | Random vs LLM | 2.646 | 2.286 | 712 | 1.6e-07 | 9.9e-07 | 1.504 | [0.90, 2.11] |
| EC30% | Rule vs Greedy | 1.657 | 0.870 | 784 | 1.3e-13 | 7.8e-13 | inf | N/A |
| EC30% | Rule vs LLM | 1.657 | 2.286 | 0 | 7.0e-12 | 4.2e-11 | -6.443 | [-7.78, -5.11] |
| EC30% | Greedy vs LLM | 0.870 | 2.286 | 0 | 7.0e-12 | 4.2e-11 | -14.493 | [-17.29, -11.70] |
| EC50% | Random vs Rule | 2.877 | 1.657 | 756 | 1.9e-10 | 1.2e-09 | 5.104 | [4.00, 6.21] |
| EC50% | Random vs Greedy | 2.877 | 1.316 | 784 | 7.0e-12 | 4.2e-11 | 6.528 | [5.18, 7.88] |
| EC50% | Random vs LLM | 2.877 | 2.306 | 745 | 7.6e-09 | 4.6e-08 | 2.169 | [1.49, 2.84] |
| EC50% | Rule vs Greedy | 1.657 | 1.316 | 784 | 1.3e-13 | 7.8e-13 | inf | N/A |
| EC50% | Rule vs LLM | 1.657 | 2.306 | 0 | 7.0e-12 | 4.2e-11 | -5.895 | [-7.13, -4.66] |
| EC50% | Greedy vs LLM | 1.316 | 2.306 | 0 | 7.0e-12 | 4.2e-11 | -8.987 | [-10.77, -7.20] |

### Table S2: Directional Consistency with Historical Trade Data (2010 Crisis)

| Action Dimension | LLM ρ | Random ρ | Rule ρ | Greedy ρ | Historical Source |
| --- | --- | --- | --- | --- | --- |
| search_alternative_source | 0.70 | 0.60 | 0.60 | 0.50 | JOGMEC (2011); GAO (2010); USGS (2011) |
| hoard_inventory | -0.60 | 0.10 | -0.20 | -0.20 | METI (2010); DoD (2010) |
| seek_ally_support | 0.10 | -0.50 | -0.20 | -0.70 | WTO DS431 (2012) |
| restrict_or_prioritize_export | 0.20 | 0.20 | 0.20 | 0.20 | USGS (2011) |
| Overall | 0.10 | 0.10 | 0.10 | -0.05 | -- |

### Table S3: CER and Supply Gap Rate by Model, Scenario, and Year

| Year | Scenario | Model | Gap Rate | Gap 95% CI | CER | CER 95% CI |
| --- | --- | --- | --- | --- | --- | --- |
| 2011 | EC15% | Greedy | 0.0006 | [0.0006, 0.0006] | 1.944 | [1.944, 1.944] |
| 2011 | EC15% | LLM | 0.0305 | [0.0274, 0.0336] | 0.803 | [0.797, 0.808] |
| 2011 | EC15% | Random | 0.0203 | [0.0077, 0.0329] | 1.494 | [1.250, 1.738] |
| 2011 | EC15% | Rule | 0.0203 | [0.0159, 0.0247] | 0.788 | [0.771, 0.805] |
| 2011 | EC30% | Greedy | 0.0013 | [0.0013, 0.0013] | 1.578 | [1.578, 1.578] |
| 2011 | EC30% | LLM | 0.0477 | [0.0436, 0.0519] | 0.717 | [0.714, 0.720] |
| 2011 | EC30% | Random | 0.0265 | [0.0097, 0.0434] | 1.240 | [1.073, 1.406] |
| 2011 | EC30% | Rule | 0.0369 | [0.0330, 0.0408] | 0.719 | [0.705, 0.733] |
| 2011 | EC50% | Greedy | 0.0727 | [0.0727, 0.0727] | 1.205 | [1.205, 1.205] |
| 2011 | EC50% | LLM | 0.0691 | [0.0634, 0.0748] | 0.628 | [0.626, 0.631] |
| 2011 | EC50% | Random | 0.0249 | [0.0125, 0.0373] | 0.986 | [0.880, 1.091] |
| 2011 | EC50% | Rule | 0.0616 | [0.0591, 0.0642] | 0.628 | [0.618, 0.638] |
| 2023 | EC15% | Greedy | 0.0273 | [0.0273, 0.0273] | -0.032 | [-0.032, -0.032] |
| 2023 | EC15% | LLM | 0.0011 | [0.0010, 0.0012] | 1.975 | [1.969, 1.981] |
| 2023 | EC15% | Random | 0.0015 | [0.0002, 0.0028] | 1.311 | [0.649, 1.974] |
| 2023 | EC15% | Rule | 0.0005 | [0.0004, 0.0006] | -0.797 | [-0.838, -0.757] |
| 2023 | EC30% | Greedy | 0.0273 | [0.0273, 0.0273] | -0.045 | [-0.045, -0.045] |
| 2023 | EC30% | LLM | 0.0011 | [0.0010, 0.0012] | 1.895 | [1.816, 1.974] |
| 2023 | EC30% | Random | 0.0006 | [0.0002, 0.0010] | 1.201 | [0.609, 1.794] |
| 2023 | EC30% | Rule | 0.0005 | [0.0004, 0.0006] | -0.800 | [-0.840, -0.759] |
| 2023 | EC50% | Greedy | 0.0268 | [0.0268, 0.0268] | -0.070 | [-0.070, -0.070] |
| 2023 | EC50% | LLM | 0.0009 | [0.0008, 0.0010] | 1.874 | [1.870, 1.879] |
| 2023 | EC50% | Random | 0.0029 | [0.0006, 0.0052] | 1.091 | [0.516, 1.666] |
| 2023 | EC50% | Rule | 0.0005 | [0.0004, 0.0006] | -0.803 | [-0.843, -0.762] |
| 2018 | EC15% | Greedy | 0.000034 | [0.000034, 0.000034] | 2.248 | [2.248, 2.248] |
| 2018 | EC15% | LLM | 0.000038 | [0.000034, 0.000042] | 1.250 | [1.240, 1.260] |
| 2018 | EC15% | Random | 0.003309 | [0.0010, 0.0056] | 1.346 | [1.100, 1.592] |
| 2018 | EC15% | Rule | 0.000039 | [0.000030, 0.000048] | 0.181 | [0.170, 0.192] |
| 2018 | EC30% | Greedy | 0.000020 | [0.000020, 0.000020] | 1.963 | [1.963, 1.963] |
| 2018 | EC30% | LLM | 0.000038 | [0.000034, 0.000042] | 1.210 | [1.200, 1.220] |
| 2018 | EC30% | Random | 0.003411 | [0.0010, 0.0058] | 1.275 | [1.030, 1.520] |
| 2018 | EC30% | Rule | 0.000039 | [0.000030, 0.000048] | 0.171 | [0.160, 0.182] |
| 2018 | EC50% | Greedy | 0.012267 | [0.012267, 0.012267] | 1.705 | [1.705, 1.705] |
| 2018 | EC50% | LLM | 0.000038 | [0.000034, 0.000042] | 1.164 | [1.154, 1.174] |
| 2018 | EC50% | Random | 0.008352 | [0.0030, 0.0137] | 1.170 | [0.940, 1.400] |
| 2018 | EC50% | Rule | 0.000039 | [0.000030, 0.000048] | 0.156 | [0.145, 0.167] |

### Table S4: Cross-LLM CER and supply gap rate, 2023 trade network (28 Monte-Carlo runs per cell)

| LLM provider | EC intensity | Mean CER (95% CI half-width) | Mean supply gap rate (95% CI half-width) | n |
| --- | --- | --- | --- | --- |
| DeepSeek-Chat (V3) | 15% | 1.975 ± 0.006 | 1.09 × 10⁻³ ± 8 × 10⁻⁵ | 28 |
| DeepSeek-Chat (V3) | 30% | 1.895 ± 0.079 | 1.11 × 10⁻³ ± 8 × 10⁻⁵ | 28 |
| DeepSeek-Chat (V3) | 50% | 1.874 ± 0.004 | 0.92 × 10⁻³ ± 8 × 10⁻⁵ | 28 |
| Qwen-Plus | 15% | 1.882 ± 0.004 | 0.32 × 10⁻³ ± 4 × 10⁻⁵ | 28 |
| Qwen-Plus | 30% | 1.838 ± 0.003 | 0.51 × 10⁻³ ± 4 × 10⁻⁵ | 28 |
| Qwen-Plus | 50% | 1.803 ± 0.003 | 0.28 × 10⁻³ ± 4 × 10⁻⁵ | 28 |
| GLM-4-Flash | 15% | 2.269 ± 0.027 | 0.62 × 10⁻³ ± 4 × 10⁻⁵ | 28 |
| GLM-4-Flash | 30% | 2.166 ± 0.023 | 0.74 × 10⁻³ ± 5 × 10⁻⁵ | 28 |
| GLM-4-Flash | 50% | 2.043 ± 0.013 | 0.64 × 10⁻³ ± 3 × 10⁻⁵ | 28 |
